# Supplementary material for: Pan-Genome Analysis Reveals Host-Specific Functional Divergences in Burkholderia gladioli
Source: MDPI journal article supplement (doi:10.3390/microorganisms9061123), 2021-05-22
Supplement: s1 [file s1]

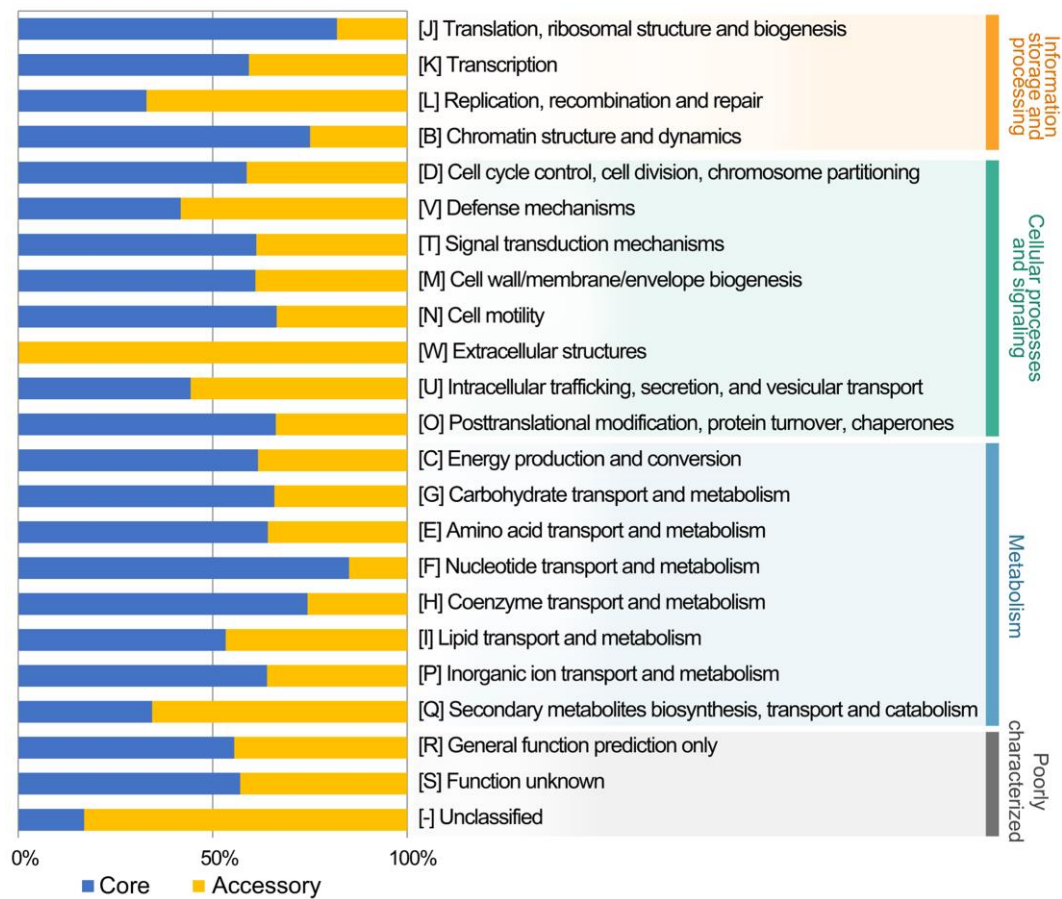

**Figure S1.** Clusters of orthologous group (COG) distribution of the *Burkholderia gladioli* core and accessory genomes.

**Table S2.** GO enrichment analysis of *Burkholderia gladioli* core genomes.

| GO ID      | Term                                     | Class          | Count | P value   |
|------------|------------------------------------------|----------------|-------|-----------|
| GO:0005737 | Cytoplasm                                | C <sup>a</sup> | 2877  | 0.00.E+00 |
| GO:0005840 | Ribosome                                 | C              | 597   | 0.00.E+00 |
| GO:0005887 | Integral component of plasma membrane    | C              | 343   | 2.14.E-12 |
| GO:0015627 | Type II protein secretion system complex | C              | 142   | 8.47.E-11 |
| GO:0005886 | Plasma membrane                          | C              | 2418  | 3.83.E-10 |
| GO:0015934 | Large ribosomal subunit                  | C              | 98    | 1.13.E-07 |
| GO:0009425 | Bacterial-type flagellum basal body      | C              | 93    | 2.56.E-07 |
| GO:0042597 | Periplasmic space                        | C              | 214   | 3.80.E-07 |
| GO:0015935 | Small ribosomal subunit                  | C              | 83    | 1.31.E-06 |
| GO:0032153 | Cell division site                       | C              | 74    | 5.71.E-06 |
| GO:0005524 | ATP binding                              | F <sup>b</sup> | 3024  | 0.00.E+00 |
| GO:0046872 | Metal ion binding                        | F              | 1873  | 0.00.E+00 |
| GO:0003735 | Structural constituent of ribosome       | F              | 734   | 0.00.E+00 |
| GO:0019843 | rRNA binding                             | F              | 467   | 0.00.E+00 |
| GO:0005525 | GTP binding                              | F              | 311   | 0.00.E+00 |
| GO:0000049 | tRNA binding                             | F              | 206   | 2.44.E-15 |
| GO:0003924 | GTPase activity                          | F              | 196   | 1.22.E-14 |
| GO:0051539 | 4 iron, 4 sulfur cluster binding         | F              | 388   | 1.62.E-12 |
| GO:0008270 | Zinc ion binding                         | F              | 524   | 4.21.E-10 |

|            |                                                   |                |     |           |
|------------|---------------------------------------------------|----------------|-----|-----------|
| GO:0004888 | Transmembrane signaling receptor activity         | F              | 120 | 3.10.E-09 |
| GO:0006412 | Translation                                       | P <sup>c</sup> | 818 | 0.00.E+00 |
| GO:0006935 | Chemotaxis                                        | P              | 224 | 1.11.E-16 |
| GO:0006457 | Protein folding                                   | P              | 206 | 2.44.E-15 |
| GO:0051301 | Cell division                                     | P              | 206 | 2.44.E-15 |
| GO:0071973 | Bacterial-type flagellum-dependent cell motility  | P              | 183 | 1.03.E-13 |
| GO:0007165 | Signal transduction                               | P              | 160 | 4.45.E-12 |
| GO:0016310 | Phosphorylation                                   | P              | 459 | 4.45.E-12 |
| GO:0007049 | Cell cycle                                        | P              | 152 | 1.65.E-11 |
| GO:0071555 | Cell wall organization                            | P              | 226 | 4.21.E-11 |
| GO:0015628 | Protein secretion by the type II secretion system | P              | 142 | 8.47.E-11 |

<sup>a</sup>Cellular component; <sup>b</sup>Molecular function; <sup>c</sup>Biological process
